# Supplementary material for: A multifunctional material of two-dimensional g-C4N3/graphene bilayer
Source: Royal Society of Chemistry journal article supplement (doi:10.1039/c6cp03946d), 2016-01-01
Supplement: c6cp03946d1.pdf [file c6cp03946d1.pdf]

## A multifunctional material of two-dimensional g-C<sub>4</sub>N<sub>3</sub>/graphene bilayer

Jie Cui<sup>a</sup>, Shuhua Liang<sup>\*a</sup>, Jianmin Zhang<sup>b</sup>

<sup>a</sup> Shaanxi Province Key Laboratory for Electrical Materials and Infiltration Technology, Xi'an University of Technology, Xi'an 710048, P.R.

China

<sup>b</sup> College of Physics and Information Technology, Shaanxi Normal University, Xi'an 710062, P.R. China

### 1. Geometry coordinates for g-C<sub>4</sub>N<sub>3</sub>/graphene bilayer.

g-C<sub>4</sub>N<sub>3</sub>/graphene

|                    |                     |                     |                    |
|--------------------|---------------------|---------------------|--------------------|
| 4.2401872388267243 | -2.4480733664876904 | 0.0000000000000000  |                    |
| 0.0000000000000000 | 4.8961467329753816  | 0.0000000000000000  |                    |
| 0.0000000000000000 | 0.0000000000000000  | 20.0000000000000000 |                    |
| C                  | 0.3332752595999153  | 0.1666376393186937  | 0.0049711917219071 |
| C                  | 0.1666910034969860  | 0.3333820943013919  | 0.0050376857153438 |
| C                  | 0.8333623742542073  | 0.1666376312872657  | 0.0049711915002391 |
| C                  | 0.6666666959989627  | 0.3333332980038435  | 0.0050237481158959 |
| C                  | 0.3333333443078175  | 0.6666666616158849  | 0.0051924340427263 |
| C                  | 0.1666910449861092  | 0.8333089493091350  | 0.0050376859693841 |
| C                  | 0.8333623664040246  | 0.6667247463040482  | 0.0049711916437687 |
| C                  | 0.6666179000577799  | 0.8333089908302185  | 0.0050376856634173 |
| C                  | 0.8276646853012366  | 0.1723353075260974  | 0.1645950067259960 |
| C                  | 0.8276646882934173  | 0.6553293796726081  | 0.1645950082619692 |
| C                  | 0.3446706155049810  | 0.1723353057090478  | 0.1645950082752989 |
| C                  | 0.999999986028385   | 0.0000000023491751  | 0.1645319484150320 |
| N                  | 0.9837374038780240  | 0.4918686992284194  | 0.1644356606200859 |
| N                  | 0.5081313028873424  | 0.4918687045946228  | 0.1644356627102539 |
| N                  | 0.5081313064263568  | 0.0162625999495560  | 0.1644356606186932 |

---

\* Author to whom correspondence should be addressed. E-mail address:

liangsh@xaut.edu.cn

## 2. The changes in charge transfer with increasing interfacial distance

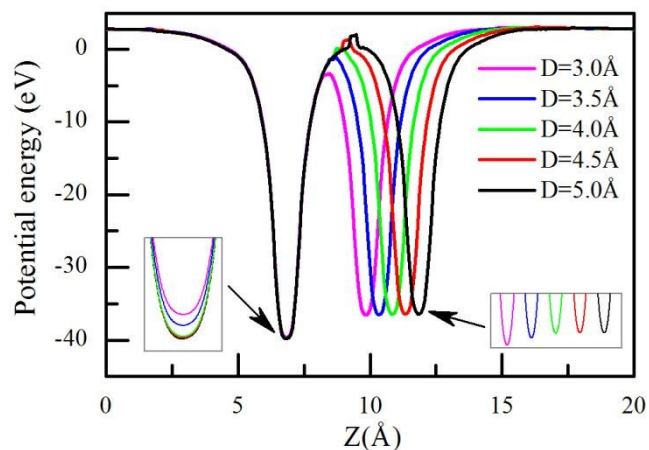

FIG. S1. XY-averaged electrostatic potentials of hybrid g-C<sub>4</sub>N<sub>3</sub>/graphene bilayer at different interfacial distances  $D$  (Å) along the Z direction. Depths of potential wells of graphene and g-C<sub>4</sub>N<sub>3</sub> are shown in the inset.

## 3. The ferromagnetic (FM), antiferromagnetic (AFM) and non-magnetic (NM) configurations

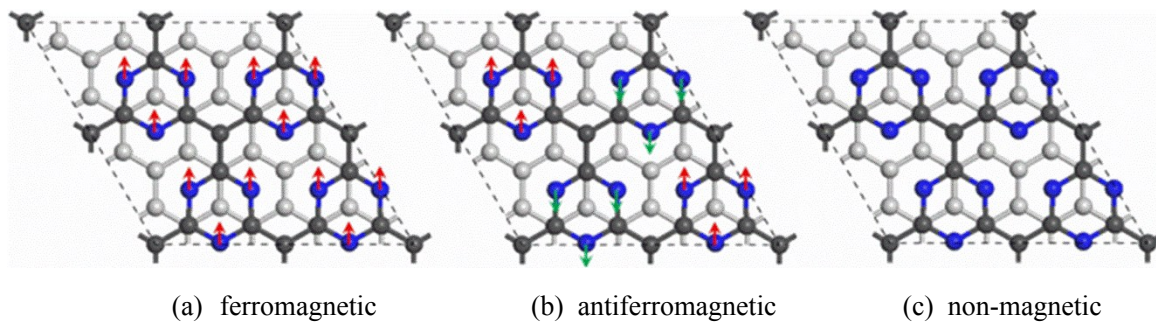

FIG. S2. The equilibrium configurations and local magnetic arrangements for (a) FM, (b) AFM, and (c) NM states.
